# Supplementary material
Source: bioRxiv or medRxiv preprint supplement (https://medrxiv.org/highwire/filestream/80649/field_highwire_adjunct_files/6/2020.05.08.20095943-6.pdf)
Supplement: Supplementary file [file 2020.05.08.20095943-6.pdf]

Table 4 Burden of disease of COVID-19 in Ecuador Estimated from the amount of Years of Life prematurely Lost (YLL) and the estimated Years Lived with Disability (YDL) and Disability Adjusted Life Years (DALY)

| Age group       | Deaths     |            |            | YLL           |              |              | Alive        |              |              | YDL       | DALY          |
|-----------------|------------|------------|------------|---------------|--------------|--------------|--------------|--------------|--------------|-----------|---------------|
|                 | All        | Women      | Men        | All           | Women        | Men          | All          | Women        | Men          |           |               |
| <b>0 to 4</b>   | 1          | 1          | 0          | 85            | 85           | 0            | 37           | 13           | 24           | 0.20      | 85.4          |
| <b>5 to 9</b>   | 1          | 1          | 0          | 81            | 81           | 0            | 66           | 29           | 37           | 0.32      | 81.5          |
| <b>10 to 14</b> | 0          | 0          | 0          | 0             | 0            | 0            | 63           | 26           | 37           | 0.26      | 0.2           |
| <b>15 to 19</b> | 0          | 0          | 0          | 0             | 0            | 0            | 115          | 55           | 60           | 0.47      | 0.4           |
| <b>20 to 24</b> | 0          | 0          | 0          | 0             | 0            | 0            | 309          | 175          | 134          | 1.27      | 1.2           |
| <b>25 to 29</b> | 4          | 2          | 2          | 246           | 123          | 123          | 953          | 482          | 471          | 4.10      | 249           |
| <b>30 to 34</b> | 9          | 3          | 6          | 508           | 169          | 339          | 1344         | 627          | 717          | 5.93      | 514           |
| <b>35 to 39</b> | 17         | 3          | 14         | 876           | 155          | 721          | 1101         | 474          | 627          | 5.28      | 881           |
| <b>40 to 44</b> | 29         | 5          | 24         | 1353          | 233          | 1119         | 995          | 428          | 567          | 5.37      | 1,357         |
| <b>45 to 49</b> | 30         | 4          | 26         | 1140          | 152          | 988          | 848          | 372          | 476          | 4.81      | 1,144         |
| <b>50 to 54</b> | 45         | 12         | 33         | 1499          | 400          | 1100         | 801          | 350          | 451          | 5.28      | 1,504         |
| <b>55 to 59</b> | 50         | 9          | 41         | 1437          | 259          | 1178         | 778          | 368          | 410          | 5.40      | 1,441         |
| <b>60 to 64</b> | 79         | 21         | 58         | 1912          | 508          | 1404         | 589          | 250          | 339          | 5.90      | 1,917         |
| <b>65 to 69</b> | 66         | 25         | 41         | 1307          | 495          | 812          | 400          | 173          | 227          | 4.55      | 1,311         |
| <b>70 to 74</b> | 56         | 18         | 38         | 875           | 281          | 594          | 257          | 112          | 145          | 3.52      | 878           |
| <b>75 to 79</b> | 38         | 13         | 25         | 447           | 153          | 294          | 175          | 71           | 104          | 2.39      | 448           |
| <b>80 to 84</b> | 25         | 9          | 16         | 208           | 75           | 133          | 97           | 46           | 51           | 1.50      | 209           |
| <b>85 to 89</b> | 15         | 7          | 8          | 60            | 28           | 32           | 42           | 21           | 21           | 0.83      | 60            |
| <b>90 to 94</b> | 7          | 4          | 3          | 19            | 11           | 8            | 17           | 7            | 10           | 0.38      | 19            |
| <b>95 to 99</b> | 2          | 0          | 2          | 4             | 0            | 4            | 7            | 5            | 2            | 0.12      | 3.8           |
| <b>Total</b>    | <b>474</b> | <b>137</b> | <b>337</b> | <b>12,055</b> | <b>3,207</b> | <b>8,847</b> | <b>8,994</b> | <b>4,084</b> | <b>4,910</b> | <b>58</b> | <b>12,112</b> |

T
